# Supplementary material for: Identification of a Ubiquinone–Ubiquinol Quinhydrone Complex in Bacterial Photosynthetic Membranes and Isolated Reaction Centers by Time-Resolved Infrared Spectroscopy
Source: MDPI journal article supplement (doi:10.3390/ijms24065233), 2023-03-09
Supplement: s1 [file s1]

# Identification of a Ubiquinone–Ubiquinol Quinhydrone Complex in Bacterial Photosynthetic Membranes and Isolated Reaction Centers by Time-Resolved Infrared Spectroscopy

Alberto Mezzetti <sup>1,2,\*</sup>, Jean-François Paul <sup>3</sup> and Winfried Leibl <sup>2</sup>

<sup>1</sup> Laboratoire de Réactivité de Surface, LRS, Sorbonne Université, CNRS, 4 Place Jussieu, 75005 Paris, France

<sup>2</sup> Institute for Integrative Biology of the Cell (I2BC), CEA, CNRS, Université Paris-Saclay, 91198 Gif sur Yvette, France

<sup>3</sup> Unité de Catalyse et Chimie du Solide, Centrale Lille Université d'Artois, Université de Lille, UMR CNRS 8181-UCCS, 59000 Lille, France

\* Correspondence: alberto.mezzetti@sorbonne-universite.fr

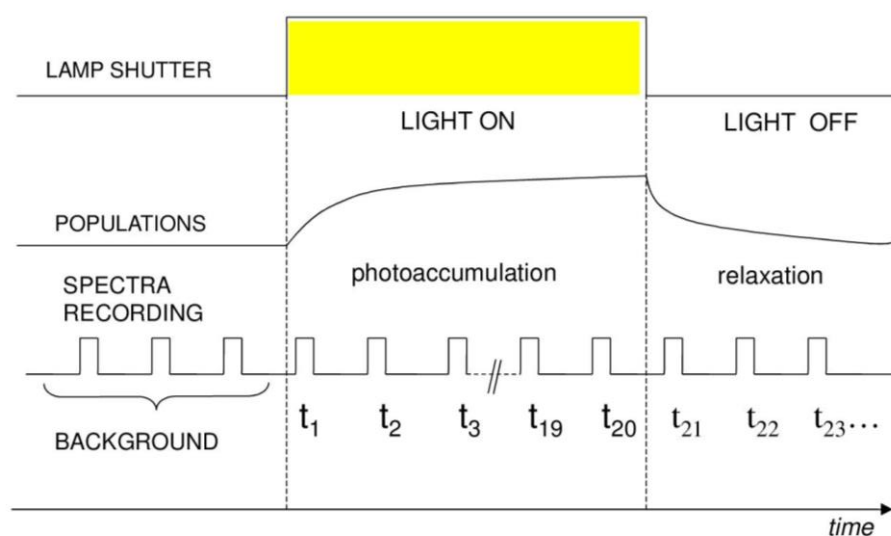

**Figure S1.** Scheme of experiments under and after illumination on chromatophores

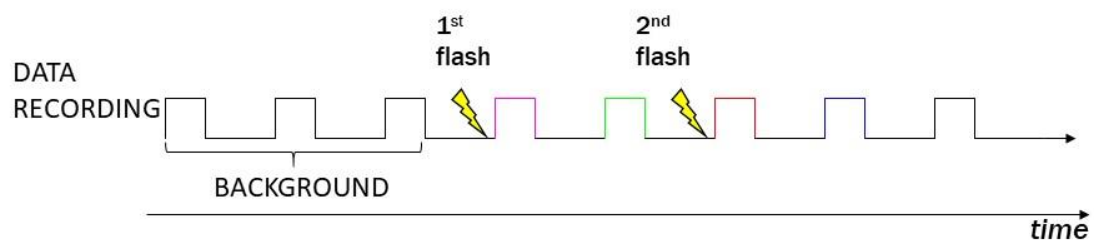

**Figure S2.** Scheme of experiments with two consecutive flashes on isolated Reaction Centers.
